# Supplementary material for: Creating inclusive digital health resources for marginalised culturally diverse families: a call to action
Source: PubMed Central journal article supplement — BMJ Paediatr Open. 2022 Nov 24;6(1):e001626. doi: 10.1136/bmjpo-2022-001626 (PMC9693660; doi:10.1136/bmjpo-2022-001626), 2022-11-24
Supplement: bmjpo-2022-001626.draft_revisions.pdf [file bmjpo-2022-001626.draft_revisions.pdf]

# BMJ Paediatrics Open

BMJ Paediatrics Open is committed to open peer review. As part of this commitment we make the peer review history of every article we publish publicly available.

When an article is published we post the peer reviewers' comments and the authors' responses online. We also post the versions of the paper that were used during peer review. These are the versions that the peer review comments apply to.

The versions of the paper that follow are the versions that were submitted during the peer review process. They are not the versions of record or the final published versions. They should not be cited or distributed as the published version of this manuscript.

BMJ Paediatrics Open is an open access journal and the full, final, typeset and author-corrected version of record of the manuscript is available on our site with no access controls, subscription charges or pay-per-view fees (<http://bmjpaedsopen.bmj.com>).

If you have any questions on BMJ Paediatrics Open's open peer review process please email [info.bmjpo@bmj.com](mailto:info.bmjpo@bmj.com)

# BMJ Paediatrics Open

## Creating Culturally Inclusive Digital Health Resources for Racialized Families: An Urgent Call to Action

|                               |                                                                                                                                                                                                                                                                                                                                                        |
|-------------------------------|--------------------------------------------------------------------------------------------------------------------------------------------------------------------------------------------------------------------------------------------------------------------------------------------------------------------------------------------------------|
| Journal:                      | <i>BMJ Paediatrics Open</i>                                                                                                                                                                                                                                                                                                                            |
| Manuscript ID                 | bmjpo-2022-001626                                                                                                                                                                                                                                                                                                                                      |
| Article Type:                 | Editorial                                                                                                                                                                                                                                                                                                                                              |
| Date Submitted by the Author: | 28-Jul-2022                                                                                                                                                                                                                                                                                                                                            |
| Complete List of Authors:     | Tengkawan, Jeslyn; Johns Hopkins University Bloomberg School of Public Health; Capella Project Foundation, Pediatrics<br>Agnihotri, Richa; University of Toronto, Community Paediatric Medicine<br>Minhas, Ripudaman; University of Toronto, Department of Pediatrics; St Michael's Hospital Li Ka Shing Knowledge Institute, Department of Pediatrics |
| Keywords:                     | Anthropology, Health services research, Technology                                                                                                                                                                                                                                                                                                     |
|                               |                                                                                                                                                                                                                                                                                                                                                        |

SCHOLARONE™  
Manuscripts

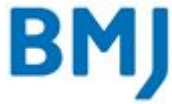

I, the Submitting Author has the right to grant and does grant on behalf of all authors of the Work (as defined in the below author licence), an exclusive licence and/or a non-exclusive licence for contributions from authors who are: i) UK Crown employees; ii) where BMJ has agreed a CC-BY licence shall apply, and/or iii) in accordance with the terms applicable for US Federal Government officers or employees acting as part of their official duties; on a worldwide, perpetual, irrevocable, royalty-free basis to BMJ Publishing Group Ltd ("BMJ") its licensees and where the relevant Journal is co-owned by BMJ to the co-owners of the Journal, to publish the Work in this journal and any other BMJ products and to exploit all rights, as set out in our [licence](#).

The Submitting Author accepts and understands that any supply made under these terms is made by BMJ to the Submitting Author unless you are acting as an employee on behalf of your employer or a postgraduate student of an affiliated institution which is paying any applicable article publishing charge ("APC") for Open Access articles. Where the Submitting Author wishes to make the Work available on an Open Access basis (and intends to pay the relevant APC), the terms of reuse of such Open Access shall be governed by a Creative Commons licence – details of these licences and which [Creative Commons](#) licence will apply to this Work are set out in our licence referred to above.

Other than as permitted in any relevant BMJ Author's Self Archiving Policies, I confirm this Work has not been accepted for publication elsewhere, is not being considered for publication elsewhere and does not duplicate material already published. I confirm all authors consent to publication of this Work and authorise the granting of this licence.

1  
2  
3 **Creating Culturally Inclusive Digital Health Resources for Racialized Families:**  
4 **An Urgent Call to Action**  
5  
6  
7

8 Jeslyn Tengkawan<sup>a,b</sup>, MD, MPH, Richa Agnihotri<sup>c</sup>, MD, Ripudaman Singh Minhas<sup>d,e</sup>, MD, MPH  
9

10  
11 **Affiliations:** <sup>a</sup>Johns Hopkins Bloomberg School of Public Health; <sup>b</sup>Capella Project Foundation;  
12  
13  
14  
15  
16  
17  
18  
19  
20  
21  
22  
23  
24  
25  
26  
27  
28  
29  
30  
31  
32  
33  
34  
35  
36  
37  
38  
39  
40  
41  
42  
43  
44  
45  
46  
47  
48  
49  
50  
51  
52  
53  
54  
55  
56  
57  
58  
59  
60  
**Community Paediatric Medicine, Department of Paediatrics, University of Toronto, Toronto, Ontario;** <sup>d</sup>Division of Developmental Pediatrics, Department of Pediatrics, Temerty Faculty of Medicine, University of Toronto, Toronto, Ontario, Canada; and <sup>e</sup>Department of Pediatrics, St. Michael's Hospital, Li Ka Shing Knowledge Institute, Unity Health Toronto, Toronto, Ontario, Canada.

**Address correspondence to:** Dr Ripudaman Singh Minhas, 61 Queen Street East, 2nd Floor, Toronto, ON M5C 2T2 Canada, [ripudaman.minhas@unityhealth.to], 416-867-3655.

**Short title:** Creating Culturally Inclusive Digital Health Resources for Racialized Families.

**Conflict of Interest Disclosures (includes financial disclosures):** All authors have no conflicts of interest to disclose.

**Funding/Support:** No funding was secured for this study.

**Abbreviations:** BHCK (B'more Healthy Communities for Kids), COVID-19 (Coronavirus Disease 2019)

1  
2  
3  
4  
5  
6  
7  
8 **What is already known on this topic** - Health information is often not accessible to a large  
9  
10 proportion of families globally. Parents need culturally acceptable and reliable information to  
11  
12 enable them to live healthily and help them make daily parenting decisions.  
13

14 **What this study adds** – This commentary discusses the need for digital child health resources  
15  
16 that are culturally inclusive, representative, and responsive to the evolving profiles and values of  
17  
18 diverse parenting communities globally.  
19

20  
21 **How this study might affect research, practice or policy** - We propose five key imperatives to  
22  
23 ensure no families are left behind in this new digital landscape and how to improve child health  
24  
25 literacy equity.  
26  
27

28  
29  
30  
31 *“How can I get my son to eat his congee?”*  
32

33 *“Is it okay that my daughter co-sleeps with her grandparents?”*  
34

35 *“I always hand feed my children. Is that a problem?”*  
36

37 *“Is it good to teach my children more than one language?”*  
38  
39  
40  
41

42 More than ever, parents and caregivers seek online health information and need access to  
43  
44 evidence-based digital health resources to inform their decision-making around their children’s  
45  
46 health and development. We know that parents’ decision-making processes impact health  
47  
48 behaviours and outcomes. As such, they ought to be addressed in a way that honours their  
49  
50 diverse values and perspectives on parenting and children’s health.<sup>1</sup>  
51  
52  
53  
54  
55  
56  
57  
58  
59  
60

1  
2  
3 While a recent survey showed that 68% of American parents searched for health and parenting-  
4 related information,<sup>2</sup> only 59% found helpful parenting information.<sup>3</sup> A survey by Neely, et al.  
5  
6 (2021) also showed that more than half of social media users did not check the accuracy of the  
7  
8 health information they retrieved on the internet.  
9  
10

11  
12  
13 Existing online resources for parents are not accessible to a large proportion of families globally  
14  
15 due to barriers relating to language, culturally-incongruent caregiving frameworks and are  
16  
17 centred on the values of healthcare providers. During the pandemic, where systemic inequities  
18  
19 have become more exacerbated, the informational needs of marginalized and racialized  
20  
21 communities have become more evident.<sup>4</sup> As the healthcare sector grapples with implementing  
22  
23 the foundational concepts of equity, diversity, and inclusion into clinical care, we must also  
24  
25 translate these into a digital space - where the vast majority of families are seeking health  
26  
27 information.  
28  
29  
30  
31  
32  
33  
34

35 This paper discusses the need for digital child health resources that are culturally inclusive,  
36  
37 representative, and responsive to the evolving profiles and values of diverse parenting  
38  
39 communities globally. Here we propose five key imperatives to ensure no families are left  
40  
41 behind in this new digital landscape.  
42  
43  
44  
45  
46

47 **First**, target communities must be included as equal partners in assessing the community's health  
48  
49 values and perceived needs, understanding what child health information is being accessed,  
50  
51 household child health decision-making dynamics, and the ideal modalities for digital delivery.  
52  
53  
54  
55  
56  
57  
58  
59  
60

1  
2  
3 Community-based participatory research has successfully engaged marginalized communities as  
4 equal partners in the design and implementation of novel in-person health solutions, leading to  
5 greater content relevance, uptake, and program sustainability. The same inclusive and  
6 participatory principles should be applied to the design and implementation of digital resources,  
7 and may be facilitated through rapid online participation strategies (e.g., online polls, comments,  
8 direct messages).

9  
10  
11  
12  
13  
14  
15  
16  
17  
18  
19 **Second**, we must prioritize research avenues that design and evaluate the digital delivery of  
20 evidence-based health information to marginalized parenting communities. There are only two  
21 relevant studies regarding the effectiveness of social media interventions in accessing child  
22 health information among marginalized and minority populations: Grow2gether and B'more  
23 Healthy Communities for Kids (BHCK) studies.

24  
25  
26  
27  
28  
29  
30  
31  
32 The Grow2gether study randomized 87 low-income, low-literacy women in Philadelphia. The  
33 intervention was conducted for 11 months in the form of interactive Facebook group discussions,  
34 and participants received stipends.<sup>5</sup> The program was found to be feasible and acceptable in the  
35 local community, with participants actively engaged in the discussion. BHCK randomized 28  
36 low-income, predominantly African-American Baltimore communities.<sup>6</sup> Overall, social media  
37 and text messaging analysis showed high dose delivery, high fidelity, and medium reach.

38  
39  
40  
41  
42  
43  
44  
45  
46  
47  
48 **Third**, academic and community partners must co-create approaches to improve health literacy  
49 and critical thinking amongst diverse communities to battle the spread of misinformation, which  
50 is seemingly ubiquitous and present in all languages and mediums. Many healthcare  
51 organizations have developed social media recommendations to help clinicians share general  
52  
53  
54  
55  
56  
57  
58  
59  
60

1  
2  
3 health information online. However, digital health education tools must be customized to the  
4  
5 diverse cultural, linguistic, and literacy profiles of the target populations.  
6  
7

8  
9  
10 **Next**, it is important to scale up and adapts the strategies of the successful social media  
11  
12 intervention programs, such as BHCK and Grow2gether, to the unique profiles of other  
13  
14 communities.<sup>5,6</sup> This is mainly to mobilize child health science in a way that is relevant and  
15  
16 applicable to parents' experiences and needs.  
17  
18

19  
20  
21 **Finally**, the global community must commit to continuing to overcome digital inequities for  
22  
23 families who do not have internet access or smartphones through multisectoral collaboration. As  
24  
25 asserted by Evans et al., “Color-blind” or pan-cultural approaches are inherently inequitable, in  
26  
27 that these generic resources are built around Eurocentric values of parenting, child health, and  
28  
29 program delivery.<sup>7</sup>  
30  
31  
32

33  
34  
35 We urge our colleagues through this call to action to improve the quality, rigour, diversity, and  
36  
37 accessibility of child health resources globally. As more parents engage in social media, there are  
38  
39 more opportunities lie ahead to increase child health literacy and advance public health through  
40  
41 population-based interventions that leverage social media.  
42  
43  
44

## 45 46 47 **References**

- 48  
49  
50 1 Minhas RS, Suleman S. The Paediatrician's role in understanding and supporting parenting  
51 practices through a health behaviour lens. *BMJ Paediatr Open*. 2019;**3**(1): e000560.  
52 doi:10.1136/bmjpo-2019-000560  
53  
54 2 Bryan MA, Evans Y, Morishita C, Midamba N, Moreno M. Parental Perceptions of the Internet  
55 and Social Media as a Source of Pediatric Health Information. *Acad Pediatr*. 2020;**20**(1): 31–8.  
56 doi:10.1016/j.acap.2019.09.009  
57  
58  
59



- 1
- 2
- 3 3 Duggan M, Lenhart A, Lampe C, Ellison NB. Parents and Social Media. Pew Research Center:  
4 Internet, Science & Tech. Published July 16, 2015. Accessed April 10, 2021.  
5 <https://www.pewresearch.org/internet/2015/07/16/parents-and-social-media/>  
6
- 7
- 8 4 Bandi S, Nevid MZ, Mahdavinia M. African American children are at higher risk of COVID-19  
9 infection. *Pediatr Allergy Immunol*. 2020;**31**(7): 861–4. doi:10.1111/pai.13298  
10
- 11 5 Fiks AG, Gruver RS, Bishop-Gilyard CT, et al. A Social Media Peer Group for Mothers To  
12 Prevent Obesity from Infancy: The Grow2Gether Randomized Trial. *Child Obes Print*.  
13 2017;**13**(5): 356–68. doi:10.1089/chi.2017.0042  
14
- 15 6 Ruggiero CF, Poirier L, Trude ACB, et al. Implementation of B’More Healthy Communities for  
16 Kids: process evaluation of a multi-level, multi-component obesity prevention intervention.  
17 *Health Educ Res*. 2018;**33**(6): 458–72. doi:10.1093/her/cyy031  
18
- 19
- 20 7 Evans MK, Rosenbaum L, Malina D, Morrissey S, Rubin EJ. Diagnosing and Treating Systemic  
21 Racism. *N Engl J Med*. 2020;**383**(3): 274–6. doi:10.1056/NEJMe2021693  
22
- 23
- 24
- 25
- 26
- 27
- 28
- 29
- 30
- 31
- 32
- 33
- 34
- 35
- 36
- 37
- 38
- 39
- 40
- 41
- 42
- 43
- 44
- 45
- 46
- 47
- 48
- 49
- 50
- 51
- 52
- 53
- 54
- 55
- 56
- 57
- 58
- 59
- 60

# BMJ Paediatrics Open

## Creating Culturally Inclusive Digital Health Resources for Racialized Families: An Urgent Call to Action

|                               |                                                                                                                                                                                                                                                                                                                                                        |
|-------------------------------|--------------------------------------------------------------------------------------------------------------------------------------------------------------------------------------------------------------------------------------------------------------------------------------------------------------------------------------------------------|
| Journal:                      | <i>BMJ Paediatrics Open</i>                                                                                                                                                                                                                                                                                                                            |
| Manuscript ID                 | bmjpo-2022-001626.R1                                                                                                                                                                                                                                                                                                                                   |
| Article Type:                 | Editorial                                                                                                                                                                                                                                                                                                                                              |
| Date Submitted by the Author: | 08-Sep-2022                                                                                                                                                                                                                                                                                                                                            |
| Complete List of Authors:     | Tengkawan, Jeslyn; Johns Hopkins University Bloomberg School of Public Health; Capella Project Foundation, Pediatrics<br>Agnihotri, Richa; University of Toronto, Community Paediatric Medicine<br>Minhas, Ripudaman; University of Toronto, Department of Pediatrics; St Michael's Hospital Li Ka Shing Knowledge Institute, Department of Pediatrics |
| Keywords:                     | Anthropology, Health services research, Technology                                                                                                                                                                                                                                                                                                     |
|                               |                                                                                                                                                                                                                                                                                                                                                        |

SCHOLARONE™  
Manuscripts

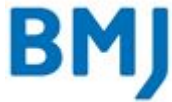

I, the Submitting Author has the right to grant and does grant on behalf of all authors of the Work (as defined in the below author licence), an exclusive licence and/or a non-exclusive licence for contributions from authors who are: i) UK Crown employees; ii) where BMJ has agreed a CC-BY licence shall apply, and/or iii) in accordance with the terms applicable for US Federal Government officers or employees acting as part of their official duties; on a worldwide, perpetual, irrevocable, royalty-free basis to BMJ Publishing Group Ltd ("BMJ") its licensees and where the relevant Journal is co-owned by BMJ to the co-owners of the Journal, to publish the Work in this journal and any other BMJ products and to exploit all rights, as set out in our [licence](#).

The Submitting Author accepts and understands that any supply made under these terms is made by BMJ to the Submitting Author unless you are acting as an employee on behalf of your employer or a postgraduate student of an affiliated institution which is paying any applicable article publishing charge ("APC") for Open Access articles. Where the Submitting Author wishes to make the Work available on an Open Access basis (and intends to pay the relevant APC), the terms of reuse of such Open Access shall be governed by a Creative Commons licence – details of these licences and which [Creative Commons](#) licence will apply to this Work are set out in our licence referred to above.

Other than as permitted in any relevant BMJ Author's Self Archiving Policies, I confirm this Work has not been accepted for publication elsewhere, is not being considered for publication elsewhere and does not duplicate material already published. I confirm all authors consent to publication of this Work and authorise the granting of this licence.

## Creating Culturally Inclusive Digital Health Resources: An Urgent Call to Action

Jeslyn Tengkawan<sup>a,b</sup>, MD, MPH, Richa Agnihotri<sup>c</sup>, MD, Ripudaman Singh Minhas<sup>d,e</sup>, MD, MPH

**Affiliations:** <sup>a</sup>Johns Hopkins Bloomberg School of Public Health; <sup>b</sup>Capella Project Foundation, Indonesia; <sup>c</sup>Community Paediatric Medicine, Department of Paediatrics, University of Toronto, Toronto, Ontario; <sup>d</sup>Division of Developmental Pediatrics, Department of Pediatrics, Temerty Faculty of Medicine, University of Toronto, Toronto, Ontario, Canada; and <sup>e</sup>Department of Pediatrics, St. Michael's Hospital, Li Ka Shing Knowledge Institute, Unity Health Toronto, Toronto, Ontario, Canada.

**Address correspondence to:** Dr Ripudaman Singh Minhas, 61 Queen Street East, 2nd Floor, Toronto, ON M5C 2T2 Canada, [ripudaman.minhas@unityhealth.to], 416-867-3655.

**Short title:** Creating Culturally Inclusive Digital Health Resources.

**Conflict of Interest Disclosures (includes financial disclosures):** All authors have no conflicts of interest to disclose.

**Funding/Support:** No funding was secured for this study.

**Abbreviations:** BHCK (B'more Healthy Communities for Kids), COVID-19 (Coronavirus Disease 2019)

1  
2  
3  
4  
5  
6  
7  
8 “How can I get my son to eat his congee?”  
9

10 “Is it okay that my daughter co-sleeps with her grandparents?”  
11

12 “I always hand feed my children. Is that a problem?”  
13

14 “Is it good to teach my children more than one language?”  
15  
16  
17  
18

19 More than ever, parents and caregivers seek online health information and need access to  
20 evidence-based digital health resources to inform their decision-making around their children’s  
21 health and development. We know that parents’ decision-making processes impact health  
22 behaviours and outcomes. As such, they ought to be addressed in a way that honours their  
23 diverse values and perspectives on parenting and children’s health.<sup>1</sup>  
24  
25  
26  
27  
28  
29  
30  
31  
32

33 While a recent survey showed that 68% of American parents searched for health and parenting-  
34 related information,<sup>2</sup> only 59% found helpful parenting information.<sup>3</sup> A survey by Neely, et al.  
35 (2021) also showed that more than half of social media users did not check the accuracy of the  
36 health information they retrieved on the internet.<sup>4</sup>  
37  
38  
39  
40  
41  
42  
43  
44

45 Existing online resources for parents are not accessible to a large proportion of families globally  
46 due to barriers relating to language, culturally-incongruent caregiving frameworks and are  
47 centred on the values of healthcare providers. During the pandemic, where systemic inequities  
48 have become more exacerbated, the informational needs of marginalized cultural-linguistic  
49 communities have become more evident.<sup>5</sup> As the healthcare sector grapples with implementing  
50  
51  
52  
53  
54  
55  
56  
57  
58  
59  
60

1  
2  
3 the foundational concepts of equity, diversity, and inclusion into clinical care, we must also  
4 translate these into a digital space - where the vast majority of families are seeking health  
5 information. Families can become reluctant to seek healthcare services as they do not have an  
6 adequate literacy on health. However, this goes both ways, where lack of access in healthcare  
7 services also reduce chances of these families to receive adequate health information, further put  
8 them at risk of unhealthy habits and parenting styles.  
9

10  
11 This paper discusses the need for digital child health resources that are culturally inclusive,  
12 representative, and responsive to the evolving profiles and values of diverse parenting  
13 communities globally. Here we propose three key imperatives to ensure no families are left  
14 behind in this new digital landscape.  
15  
16  
17  
18

19  
20  
21  
22  
23  
24  
25  
26  
27  
28  
29  
30  
31 **First**, we must ensure accessibility of child health information and leveraging the new  
32 technologies. However, alternatives of old modalities, such as radio, should be considered  
33 whenever the new technologies are not available. The global community must commit to  
34 continuing to overcome digital inequities for families who do not have internet access or  
35 smartphones through multisectoral collaboration. We should engage whole of society approach  
36 with multi-dimension resource to maximize any intervention, especially in improving health  
37 literacy through digital health. As asserted by Evans et al., “Colour-blind” or pan-cultural  
38 approaches are inherently inequitable, in that these generic resources are built around  
39 Eurocentric values of parenting, child health, and program delivery.<sup>6</sup>  
40  
41  
42  
43  
44  
45  
46  
47  
48  
49  
50  
51  
52  
53  
54  
55  
56  
57  
58  
59  
60

1  
2  
3 All communities must be included as equal partners in assessing the community's health values  
4 and perceived needs, understanding what child health information is being accessed, household  
5 child health decision-making dynamics, and the ideal modalities for digital delivery.  
6  
7  
8  
9

10  
11  
12 **Second**, child health information should be relevant and culturally acceptable. Academic and  
13 community partners must co-create approaches to improve health literacy and critical thinking  
14 amongst diverse communities to battle the spread of misinformation, which is seemingly  
15 ubiquitous and present in all languages and mediums. Many healthcare organizations have  
16 developed social media recommendations to help clinicians share general health information  
17 online. However, digital health education tools must be customised to the diverse cultural,  
18 linguistic, and literacy profiles of the population of interest.  
19  
20  
21  
22  
23  
24  
25  
26  
27  
28  
29

30  
31 Community-based participatory research has successfully engaged marginalized communities as  
32 equal partners in the design and implementation of novel in-person health solutions, leading to  
33 greater content relevance, uptake, and program sustainability. The same inclusive and  
34 participatory principles should be applied to the design and implementation of digital resources,  
35 and may be facilitated through rapid online participation strategies (e.g., online polls, comments,  
36 direct messages).  
37  
38  
39  
40  
41  
42  
43  
44  
45  
46

47 **Finally**, these modalities should be evidence-based, evaluated for their impacts in individual and  
48 community settings. We must prioritize research avenues that design and evaluate the digital  
49 delivery of evidence-based health information to marginalized parenting communities. There are  
50 only two relevant studies regarding the effectiveness of social media interventions in accessing  
51  
52  
53  
54  
55  
56  
57  
58  
59  
60

1  
2  
3 child health information among marginalized cultural-linguistic populations: Grow2gether and  
4  
5 B'more Healthy Communities for Kids (BHCK) studies.  
6  
7

8  
9 The Grow2gether study randomized 87 low-income, low-literacy women in Philadelphia. The  
10  
11 intervention was conducted for 11 months in the form of interactive Facebook group discussions,  
12  
13 and participants received stipends.<sup>7</sup> The program was found to be feasible and acceptable in the  
14  
15 local community, with participants actively engaged in the discussion. BHCK randomized 28  
16  
17 low-income, predominantly African-American Baltimore communities.<sup>8</sup> It is important to scale  
18  
19 up and adapt the strategies of the successful social media intervention programs, such as BHCK  
20  
21 and Grow2gether, to the unique profiles of other communities.<sup>7,8</sup> This is mainly to mobilize child  
22  
23 health science in a way that is relevant and applicable to parents' experiences and needs.  
24  
25

26  
27 Overall, social media and text messaging analysis showed high dose delivery, high fidelity, and  
28  
29 medium reach.  
30  
31

32  
33  
34 We urge our colleagues through this call to action to improve the quality, rigour, diversity, and  
35  
36 accessibility of child health resources globally. As more parents engage in social media, there are  
37  
38 more opportunities lie ahead to increase child health literacy and advance public health through  
39  
40 population-based interventions that leverage social media.  
41  
42  
43  
44

## 45 46 47 **References**

- 48  
49 1 Minhas RS, Suleman S. The Paediatrician's role in understanding and supporting parenting  
50  
51 practices through a health behaviour lens. *BMJ Paediatr Open*. 2019;**3**(1): e000560.  
52  
53 doi:10.1136/bmjpo-2019-000560  
54  
55 2 Bryan MA, Evans Y, Morishita C, Midamba N, Moreno M. Parental Perceptions of the Internet  
56  
57 and Social Media as a Source of Pediatric Health Information. *Acad Pediatr*. 2020;**20**(1): 31–8.  
58  
59 doi:10.1016/j.acap.2019.09.009  
60



- 1  
2  
3 3 Duggan M, Lenhart A, Lampe C, Ellison NB. Parents and Social Media. Pew Research Center:  
4 Internet, Science & Tech. Published July 16, 2015. Accessed April 10, 2021.  
5 <https://www.pewresearch.org/internet/2015/07/16/parents-and-social-media/>  
6  
7  
8 4 Neely S, Eldredge C, Sanders R. Health Information Seeking Behaviors on Social Media During  
9 the COVID-19 Pandemic Among American Social Networking Site Users: Survey Study. *J Med*  
10 *Internet Res.* 2021;23(6):e29802. Published 2021 Jun 11. doi:10.2196/29802  
11  
12 5 Bandi S, Nevid MZ, Mahdavinia M. African American children are at higher risk of COVID-19  
13 infection. *Pediatr Allergy Immunol.* 2020;31(7): 861–4. doi:10.1111/pai.13298  
14  
15 6 Evans MK, Rosenbaum L, Malina D, Morrissey S, Rubin EJ. Diagnosing and Treating Systemic  
16 Racism. *N Engl J Med.* 2020;383(3): 274–6. doi:10.1056/NEJMe2021693  
17  
18  
19  
20  
21 7 Fiks AG, Gruver RS, Bishop-Gilyard CT, et al. A Social Media Peer Group for Mothers To  
22 Prevent Obesity from Infancy: The Grow2Gether Randomized Trial. *Child Obes Print.*  
23 2017;13(5): 356–68. doi:10.1089/chi.2017.0042  
24  
25 8 Ruggiero CF, Poirier L, Trude ACB, et al. Implementation of B'More Healthy Communities for  
26 Kids: process evaluation of a multi-level, multi-component obesity prevention intervention.  
27 *Health Educ Res.* 2018;33(6): 458–72. doi:10.1093/her/cyy031  
28  
29  
30  
31  
32  
33  
34  
35  
36  
37  
38  
39  
40  
41  
42  
43  
44  
45  
46  
47  
48  
49  
50  
51  
52  
53  
54  
55  
56  
57  
58  
59  
60

# BMJ Paediatrics Open

## Creating Inclusive Digital Health Resources for Marginalised Culturally Diverse Families: A Call to Action

|                               |                                                                                                                                                                                                                                                                                                                                            |
|-------------------------------|--------------------------------------------------------------------------------------------------------------------------------------------------------------------------------------------------------------------------------------------------------------------------------------------------------------------------------------------|
| Journal:                      | <i>BMJ Paediatrics Open</i>                                                                                                                                                                                                                                                                                                                |
| Manuscript ID                 | bmjpo-2022-001626.R2                                                                                                                                                                                                                                                                                                                       |
| Article Type:                 | Editorial                                                                                                                                                                                                                                                                                                                                  |
| Date Submitted by the Author: | 15-Sep-2022                                                                                                                                                                                                                                                                                                                                |
| Complete List of Authors:     | Tengkawan, Jeslyn; Johns Hopkins University Bloomberg School of Public Health; Capella Project Foundation<br>Agnihotri, Richa; University of Toronto, Community Paediatric Medicine<br>Minhas, Ripudaman; University of Toronto, Department of Pediatrics; St Michael's Hospital Li Ka Shing Knowledge Institute, Department of Pediatrics |
| Keywords:                     | Anthropology, Health services research, Technology                                                                                                                                                                                                                                                                                         |
|                               |                                                                                                                                                                                                                                                                                                                                            |

SCHOLARONE™  
Manuscripts



I, the Submitting Author has the right to grant and does grant on behalf of all authors of the Work (as defined in the below author licence), an exclusive licence and/or a non-exclusive licence for contributions from authors who are: i) UK Crown employees; ii) where BMJ has agreed a CC-BY licence shall apply, and/or iii) in accordance with the terms applicable for US Federal Government officers or employees acting as part of their official duties; on a worldwide, perpetual, irrevocable, royalty-free basis to BMJ Publishing Group Ltd ("BMJ") its licensees and where the relevant Journal is co-owned by BMJ to the co-owners of the Journal, to publish the Work in this journal and any other BMJ products and to exploit all rights, as set out in our [licence](#).

The Submitting Author accepts and understands that any supply made under these terms is made by BMJ to the Submitting Author unless you are acting as an employee on behalf of your employer or a postgraduate student of an affiliated institution which is paying any applicable article publishing charge ("APC") for Open Access articles. Where the Submitting Author wishes to make the Work available on an Open Access basis (and intends to pay the relevant APC), the terms of reuse of such Open Access shall be governed by a Creative Commons licence – details of these licences and which [Creative Commons](#) licence will apply to this Work are set out in our licence referred to above.

Other than as permitted in any relevant BMJ Author's Self Archiving Policies, I confirm this Work has not been accepted for publication elsewhere, is not being considered for publication elsewhere and does not duplicate material already published. I confirm all authors consent to publication of this Work and authorise the granting of this licence.

1  
2  
3 **Creating Inclusive Digital Health Resources for Marginalised Culturally Diverse Families:**  
4 **A Call to Action**

5  
6 Jeslyn Tengkawan<sup>a,b</sup>, MD, MPH, Richa Agnihotri<sup>c</sup>, MD, Ripudaman Singh Minhas<sup>d,e</sup>, MD, MPH  
7  
8  
9

10 **Affiliations:** <sup>a</sup>Johns Hopkins Bloomberg School of Public Health; <sup>b</sup>Capella Project Foundation,  
11 Indonesia; <sup>c</sup>Community Paediatric Medicine, Department of Paediatrics, University of Toronto,  
12 Toronto, Ontario; <sup>d</sup>Division of Developmental Pediatrics, Department of Pediatrics, Temerty  
13 Faculty of Medicine, University of Toronto, Toronto, Ontario, Canada; and <sup>e</sup>Department of  
14 Pediatrics, St. Michael's Hospital, Li Ka Shing Knowledge Institute, Unity Health Toronto,  
15 Toronto, Ontario, Canada.  
16  
17  
18  
19  
20  
21  
22

23 **Address correspondence to:** Dr Ripudaman Singh Minhas, 61 Queen Street East, 2nd Floor,  
24 Toronto, ON M5C 2T2 Canada, [ripudaman.minhas@unityhealth.to], 416-867-3655.  
25  
26  
27  
28

29 **Short title:** Creating Culturally Inclusive Digital Health Resources.  
30  
31  
32

33 **Conflict of Interest Disclosures (includes financial disclosures):** All authors have no conflicts of  
34 interest to disclose.  
35  
36  
37  
38

39 **Funding/Support:** No funding was secured for this study.  
40  
41  
42

43 **Abbreviations:** BHCK (B'more Healthy Communities for Kids), COVID-19 (Coronavirus  
44 Disease 2019)  
45  
46  
47  
48  
49  
50  
51  
52  
53  
54  
55  
56  
57  
58  
59  
60

1  
2  
3  
4  
5  
6  
7  
8 “How can I get my son to eat his congee?”  
9

10 “Is it okay that my daughter co-sleeps with her grandparents?”  
11

12 “I always hand feed my children. Is that a problem?”  
13

14 “Is it good to teach my children more than one language?”  
15  
16  
17  
18

19 More than ever, parents and caregivers seek online health information and need access to  
20 evidence-based digital health resources to inform their decision-making around their children’s  
21 health and development. We know that parents’ decision-making processes impact health  
22 behaviours and outcomes. As such, they ought to be addressed in a way that honours their  
23 diverse values and perspectives on parenting and children’s health.<sup>1</sup>  
24  
25  
26  
27  
28  
29  
30  
31  
32

33 While a recent survey showed that 68% of American parents searched for health and parenting-  
34 related information,<sup>2</sup> only 59% found helpful parenting information.<sup>3</sup> A survey by Neely, et al.  
35 (2021) also showed that more than half of social media users did not check the accuracy of the  
36 health information they retrieved on the internet.<sup>4</sup>  
37  
38  
39  
40  
41  
42  
43  
44

45 Existing online resources for parents are not accessible to a large proportion of families globally  
46 due to barriers relating to language, culturally-incongruent caregiving frameworks and are  
47 centred on the values of healthcare providers. During the pandemic, where systemic inequities  
48 have become more exacerbated, the informational needs of marginalized cultural-linguistic  
49 communities have become more evident.<sup>5</sup> As the healthcare sector grapples with implementing  
50  
51  
52  
53  
54  
55  
56  
57  
58  
59  
60

1  
2  
3 the foundational concepts of equity, diversity, and inclusion into clinical care, we must also  
4 translate these into a digital space - where many families search for relevant health information.  
5  
6 Families can become reluctant to seek healthcare services as they do not have an adequate  
7 literacy on health. However, this goes both ways, where lack of access in healthcare services also  
8 reduce chances of these families to receive adequate health information, further put them at risk  
9 of unhealthy habits and parenting styles.  
10  
11  
12  
13  
14  
15  
16  
17  
18

19 This paper discusses the need for digital child health resources that are culturally inclusive,  
20 representative, and responsive to the evolving profiles and values of diverse parenting  
21 communities globally. Here we propose three key imperatives to ensure no families are left  
22 behind in this new digital landscape.  
23  
24  
25  
26  
27  
28  
29  
30

31 **First**, we must ensure accessibility of child health information and leveraging the new  
32 technologies. However, alternatives of old modalities, such as radio, should be considered  
33 whenever the new technologies are not available. The global community must commit to  
34 continuing to overcome digital inequities for families who do not have internet access or  
35 smartphones through multisectoral collaboration. We should engage whole of society approach  
36 with multi-dimension resource to maximize any intervention, especially in improving health  
37 literacy through digital health. As asserted by Evans et al., “Colour-blind” or pan-cultural  
38 approaches are inherently inequitable, in that these generic resources are built around  
39 Eurocentric values of parenting, child health, and program delivery.<sup>6</sup>  
40  
41  
42  
43  
44  
45  
46  
47  
48  
49  
50  
51  
52  
53  
54  
55  
56  
57  
58  
59  
60

1  
2  
3 All communities must be included as equal partners in assessing the community's health values  
4 and perceived needs, understanding what child health information is being accessed, household  
5 child health decision-making dynamics, and the ideal modalities for digital delivery.  
6  
7

8  
9  
10  
11  
12 **Second**, child health information should be relevant and culturally acceptable. Academic and  
13 community partners must co-create approaches to improve health literacy and critical thinking  
14 amongst diverse communities to battle the spread of misinformation, which is seemingly  
15 ubiquitous and present in all languages and mediums. Many healthcare organizations have  
16 developed social media recommendations to help clinicians share general health information  
17 online. However, digital health education tools must be customised to the diverse cultural,  
18 linguistic, and literacy profiles of the population of interest.  
19  
20  
21  
22  
23  
24  
25  
26  
27  
28  
29  
30

31 Community-based participatory research has successfully engaged marginalized communities as  
32 equal partners in the design and implementation of novel in-person health solutions, leading to  
33 greater content relevance, uptake, and program sustainability. The same inclusive and  
34 participatory principles should be applied to the design and implementation of digital resources,  
35 and may be facilitated through rapid online participation strategies (e.g., online polls, comments,  
36 direct messages).  
37  
38  
39  
40  
41  
42  
43  
44  
45  
46

47 **Finally**, these modalities should be evidence-based, evaluated for their impacts in individual and  
48 community settings. We must prioritize research avenues that design and evaluate the digital  
49 delivery of evidence-based health information to marginalized parenting communities. There are  
50 only two relevant studies regarding the effectiveness of social media interventions in accessing  
51  
52  
53  
54  
55  
56  
57  
58  
59  
60

1  
2  
3 child health information among marginalized cultural-linguistic populations: Grow2gether and  
4  
5 B'more Healthy Communities for Kids (BHCK) studies.  
6  
7

8  
9 The Grow2gether study randomized 87 low-income, low-literacy women in Philadelphia. The  
10  
11 intervention was conducted for 11 months in the form of interactive Facebook group discussions,  
12  
13 and participants received stipends.<sup>7</sup> The program was found to be feasible and acceptable in the  
14  
15 local community, with participants actively engaged in the discussion. BHCK randomized 28  
16  
17 low-income, predominantly African-American Baltimore communities.<sup>8</sup> It is important to scale  
18  
19 up and adapt the strategies of the successful social media intervention programs, such as BHCK  
20  
21 and Grow2gether, to the unique profiles of other communities.<sup>7,8</sup> This is mainly to mobilize child  
22  
23 health science in a way that is relevant and applicable to parents' experiences and needs.  
24  
25

26  
27 Overall, social media and text messaging analysis showed high dose delivery, high fidelity, and  
28  
29 medium reach.  
30  
31

32  
33  
34 We urge our colleagues through this call to action to improve the quality, rigour, diversity, and  
35  
36 accessibility of child health resources globally. As more parents engage in social media, there are  
37  
38 more opportunities lie ahead to increase child health literacy and advance public health through  
39  
40 population-based interventions that leverage social media.  
41  
42  
43  
44

## 45 46 47 **References**

- 48  
49 1 Minhas RS, Suleman S. The Paediatrician's role in understanding and supporting parenting  
50  
51 practices through a health behaviour lens. *BMJ Paediatr Open*. 2019;**3**(1): e000560.  
52  
53 doi:10.1136/bmjpo-2019-000560  
54  
55 2 Bryan MA, Evans Y, Morishita C, Midamba N, Moreno M. Parental Perceptions of the Internet  
56  
57 and Social Media as a Source of Pediatric Health Information. *Acad Pediatr*. 2020;**20**(1): 31–8.  
58  
59 doi:10.1016/j.acap.2019.09.009  
60



- 1  
2  
3 3 Duggan M, Lenhart A, Lampe C, Ellison NB. Parents and Social Media. Pew Research Center:  
4 Internet, Science & Tech. Published July 16, 2015. Accessed April 10, 2021.  
5 <https://www.pewresearch.org/internet/2015/07/16/parents-and-social-media/>  
6  
7  
8 4 Neely S, Eldredge C, Sanders R. Health Information Seeking Behaviors on Social Media During  
9 the COVID-19 Pandemic Among American Social Networking Site Users: Survey Study. *J Med*  
10 *Internet Res.* 2021;23(6):e29802. Published 2021 Jun 11. doi:10.2196/29802  
11  
12 5 Bandi S, Nevid MZ, Mahdavinia M. African American children are at higher risk of COVID-19  
13 infection. *Pediatr Allergy Immunol.* 2020;31(7): 861–4. doi:10.1111/pai.13298  
14  
15 6 Evans MK, Rosenbaum L, Malina D, Morrissey S, Rubin EJ. Diagnosing and Treating Systemic  
16 Racism. *N Engl J Med.* 2020;383(3): 274–6. doi:10.1056/NEJMe2021693  
17  
18  
19  
20  
21 7 Fiks AG, Gruver RS, Bishop-Gilyard CT, et al. A Social Media Peer Group for Mothers To  
22 Prevent Obesity from Infancy: The Grow2Gether Randomized Trial. *Child Obes Print.*  
23 2017;13(5): 356–68. doi:10.1089/chi.2017.0042  
24  
25 8 Ruggiero CF, Poirier L, Trude ACB, et al. Implementation of B'More Healthy Communities for  
26 Kids: process evaluation of a multi-level, multi-component obesity prevention intervention.  
27 *Health Educ Res.* 2018;33(6): 458–72. doi:10.1093/her/cyy031  
28  
29  
30  
31  
32  
33  
34  
35  
36  
37  
38  
39  
40  
41  
42  
43  
44  
45  
46  
47  
48  
49  
50  
51  
52  
53  
54  
55  
56  
57  
58  
59  
60
